# Supplementary material
Source: PubMed Central journal article supplement (PMC3148406)
Supplement: NIHMS304759-supplement-3.pdf [file NIHMS304759-supplement-3.pdf]

## Sheet1

| Transcript Id | Fold change | direction | gene symbol   | genedescription                                                             |
|---------------|-------------|-----------|---------------|-----------------------------------------------------------------------------|
| 10351293      | 216.73323   | down      | Dpt           | dermatopontin                                                               |
| 10458894      | 143.38281   | down      | Lox           | lysyl oxidase                                                               |
| 10600169      | 142.54616   | down      | Bgn           | biglycan                                                                    |
| 10363455      | 137.66934   | up        | Pcbd1         | pterin 4a carbinolamine dehydratase/dimerization cofactor of HNF1a (TCF1) 1 |
| 10365974      | 137.1432    | down      | Dcn           | decorin                                                                     |
| 10543959      | 104.785416  | down      | Ptn           | pleiotrophin                                                                |
| 10440534      | 103.986885  | down      | Adamts5       | disintegrin-like and metallopeptidase with thrombospondin type 1 motif, 5   |
| 10492021      | 103.6441    | down      | Postn         | periostin, osteoblast specific factor                                       |
| 10376765      | 94.146225   | up        | Aldh3a1       | aldehyde dehydrogenase family 3, subfamily A1                               |
| 10440522      | 91.45299    | down      | Adamts1       | disintegrin-like and metallopeptidase with thrombospondin type 1 motif, 1   |
| 10405047      | 88.90514    | down      | Aspn          | asporin                                                                     |
| 10439500      | 80.32767    | up        | Upk1b         | uroplakin 1B                                                                |
| 10407350      | 79.92412    | down      | Fgf10         | fibroblast growth factor 10                                                 |
| 10391036      | 78.4518     | up        | Krt19         | keratin 19                                                                  |
| 10453747      | 77.859116   | down      | Colec12       | collectin sub-family member 12                                              |
| 10499899      | 75.68216    | up        | Sprr1a        | small proline-rich protein 1A                                               |
| 10388430      | 75.171196   | down      | Serpinf1      | serine (or cysteine) peptidase inhibitor, clade F, member 1                 |
| 10513739      | 71.58821    | down      | Tnc           | tenascin C                                                                  |
| 10406504      | 71.27405    | down      | Edil3         | EGF-like repeats and discoidin I-like domains 3                             |
| 10459866      | 70.65572    | up        | Slc14a1       | solute carrier family 14 (urea transporter), member 1                       |
| 10449000      | 67.96421    | up        | Msln          | mesothelin                                                                  |
| 10359624      | 66.92822    | down      | Prrx1         | paired related homeobox 1                                                   |
| 10447951      | 63.957516   | down      | Thbs2         | thrombospondin 2                                                            |
| 10593123      | 62.123264   | down      | Tagln         | transgelin                                                                  |
| 10356520      | 57.437923   | down      | Col6a3        | collagen, type VI, alpha 3                                                  |
| 10597817      | 57.21979    | down      | Cck           | cholecystokinin                                                             |
| 10359929      | 55.74221    | down      | Ddr2          | discoidin domain receptor family, member 2                                  |
| 10417212      | 54.726257   | down      | Itgbl1        | integrin, beta-like 1                                                       |
| 10563077      | 54.355755   | down      | Rcn3          | reticulocalbin 3, EF-hand calcium binding domain                            |
| 10585438      | 53.878487   | down      | Crabp1        | cellular retinoic acid binding protein I                                    |
| 10573924      | 53.52301    | down      | Mmp2          | matrix metallopeptidase 2                                                   |
| 10492682      | 53.265003   | down      | 1110032E23Rik | RIKEN cDNA 1110032E23 gene                                                  |
| 10527649      | 51.091457   | down      | 6330406115Rik | RIKEN cDNA 6330406115 gene                                                  |
| 10381122      | 50.29607    | down      | Fkbp10        | FK506 binding protein 10                                                    |
| 10398075      | 49.35316    | down      | Serpina3n     | serine (or cysteine) peptidase inhibitor, clade A, member 3N                |
| 10432918      | 49.085392   | up        | Krt8          | keratin 8                                                                   |
| 10548892      | 48.912445   | down      | Arhgdib       | Rho, GDP dissociation inhibitor (GDI) beta                                  |

## Sheet1

|          |                |         |                                                                         |
|----------|----------------|---------|-------------------------------------------------------------------------|
| 10569618 | 48.578957 up   | Tmem16a | transmembrane protein 16A                                               |
| 10502780 | 47.71223 down  | Lphn2   | latrophilin 2                                                           |
| 10456046 | 46.102406 down | Pdgfrb  | platelet derived growth factor receptor, beta polypeptide               |
| 10581013 | 45.16725 down  | Cdh11   | cadherin 11                                                             |
| 10607143 | 45.049812 down | Capn6   | calpain 6                                                               |
| 10414065 | 43.99296 up    | Anxa8   | annexin A8                                                              |
| 10359908 | 42.783 up      | Rgs4    | regulator of G-protein signaling 4                                      |
| 10536220 | 41.556595 down | Col1a2  | collagen, type I, alpha 2                                               |
| 10477920 | 41.261475 down | Myl9    | myosin, light polypeptide 9, regulatory                                 |
| 10541496 | 40.72306 down  | Mfap5   | microfibrillar associated protein 5                                     |
| 10494262 | 40.705685 down | Ctsk    | cathepsin K                                                             |
| 10405179 | 40.465397 down | Edg3    | endothelial differentiation, sphingolipid G-protein-coupled receptor, 3 |
| 10571797 | 40.274498 down | Asb5    | ankyrin repeat and SOCs box-containing protein 5                        |
| 10594066 | 39.944244 down | Loxl1   | lysyl oxidase-like 1                                                    |
| 10502778 | 38.900204 down | Lphn2   | latrophilin 2                                                           |
| 10485948 | 38.899113 down | Grem1   | gremlin 1                                                               |
| 10584628 | 38.893764 down | Thy1    | thymus cell antigen 1, theta                                            |
| 10534152 | 38.468647 down | Wbscr17 | Williams-Beuren syndrome chromosome region 17 homolog (human)           |
| 10495675 | 38.2326 down   | F3      | coagulation factor III                                                  |
| 10467191 | 36.874565 down | Ankrd1  | ankyrin repeat domain 1 (cardiac muscle)                                |
| 10553833 | 36.790554 down | Ndn     | neccdin                                                                 |
| 10405063 | 36.421165 down | Ogn     | osteoglycin                                                             |
| 10576235 | 36.41334 down  | Dpep1   | dipeptidase 1 (renal)                                                   |
| 10532741 | 35.30677 down  | Tmem119 | transmembrane protein 119                                               |
| 10583809 | 35.22001 down  | Cnn1    | calponin 1                                                              |
| 10519886 | 33.948605 up   | Sema3c  | sema domain, immunoglobulin domain (Ig), (semaphorin) 3C                |
| 10398354 | 33.025837 down |         |                                                                         |
| 10380419 | 32.82013 down  | Col1a1  | collagen, type I, alpha 1                                               |
| 10545707 | 32.673874 down | Actg2   | actin, gamma 2, smooth muscle, enteric                                  |
| 10571567 | 32.302418 up   | Sorbs2  | sorbin and SH3 domain containing 2                                      |
| 10502776 | 31.565466 down | Lphn2   | latrophilin 2                                                           |
| 10445325 | 31.094843 down | Rcan2   | regulator of calcineurin 2                                              |
| 10441902 | 30.767342 down | Smoc2   | SPARC related modular calcium binding 2                                 |
| 10405587 | 30.667875 down | Tgfb1   | transforming growth factor, beta induced                                |
| 10377319 | 30.36253 down  | Myh10   | myosin, heavy polypeptide 10, non-muscle                                |
| 10462442 | 30.182878 up   | Il33    | interleukin 33                                                          |
| 10501608 | 29.91779 down  | Vcam1   | vascular cell adhesion molecule 1                                       |
| 10466587 | 28.88862 up    | Rorb    | RAR-related orphan receptor beta                                        |

## Sheet1

|          |           |      |               |                                                              |
|----------|-----------|------|---------------|--------------------------------------------------------------|
| 10413609 | 28.267513 | down | Mustn1        | musculoskeletal, embryonic nuclear protein 1                 |
| 10531724 | 28.264132 | down | Plac8         | placenta-specific 8                                          |
| 10587880 | 28.069523 | up   | Pcolce2       | procollagen C-endopeptidase enhancer 2                       |
| 10591139 | 27.580383 | down | Naalad2       | N-acetylated alpha-linked acidic dipeptidase 2               |
| 10484389 | 27.04927  | down | Tfpi          | tissue factor pathway inhibitor                              |
| 10582303 | 26.675245 | down | Cyba          | cytochrome b-245, alpha polypeptide                          |
| 10344674 | 26.389137 | down | EG620393      |                                                              |
| 10547740 | 26.344946 | down | C1s           | complement component 1, s subcomponent                       |
| 10408557 | 25.893782 | up   | Serpinb1a     | serine (or cysteine) peptidase inhibitor, clade B, member 1a |
| 10351504 | 25.593824 | down | AI506816      |                                                              |
| 10394534 | 25.499779 | down | Osr1          | odd-skipped related 1 (Drosophila)                           |
| 10381898 | 25.437933 | down | Mrc2          | mannose receptor, C type 2                                   |
| 10410931 | 25.225464 | down | Vcan          | versican                                                     |
| 10375402 | 25.004147 | down | Adam19        | a disintegrin and metallopeptidase domain 19 (meltrin beta)  |
| 10436727 | 24.69631  | down | ORF63         | open reading frame 63                                        |
| 10427075 | 24.668621 | up   | Krt18         | keratin 18                                                   |
| 10572070 | 24.651798 | down | Npy1r         | neuropeptide Y receptor Y1                                   |
| 10511363 | 24.53431  | down | Penk1         | preproenkephalin 1                                           |
| 10538187 | 24.180893 | down | Gpnmb         | glycoprotein (transmembrane) nmb                             |
| 10587639 | 24.167542 | down | Nt5e          | 5' nucleotidase, ecto                                        |
| 10474048 | 24.128897 | up   | Syt13         | synaptotagmin XIII                                           |
| 10390117 | 24.128496 | up   | Itga3         | integrin alpha 3                                             |
| 10575052 | 24.102783 | up   | Cdh1          | cadherin 1                                                   |
| 10461251 | 23.437145 | down | 1110067112Rik | RIKEN cDNA 1110067112 gene                                   |
| 10522503 | 23.087215 | down | Pdgfra        | platelet derived growth factor receptor, alpha polypeptide   |
| 10557470 | 23.000631 | up   | Gdpd3         | glycerophosphodiester phosphodiesterase domain containing 3  |
| 10585048 | 22.99382  | up   | Cadm1         | cell adhesion molecule 1                                     |
| 10370180 | 22.94075  | down | Col6a2        | collagen, type VI, alpha 2                                   |
| 10348471 | 22.934088 | up   | Mlph          | melanophilin                                                 |
| 10538150 | 22.909018 | up   | Tmem176a      | transmembrane protein 176A                                   |
| 10542335 | 22.82901  | up   | Gprc5a        | G protein-coupled receptor, family C, group 5, member A      |
| 10496125 | 22.74389  | down | Dkk2          | dickkopf homolog 2 (Xenopus laevis)                          |
| 10423599 | 22.647814 | down | Matn2         | matrilin 2                                                   |
| 10538482 | 22.123882 | down | Adcyap1r1     | adenylate cyclase activating polypeptide 1 receptor 1        |
| 10513722 | 22.02976  | up   | Tnfsf15       | tumor necrosis factor (ligand) superfamily, member 15        |
| 10427125 | 21.484245 | down | Igfbp6        | insulin-like growth factor binding protein 6                 |
| 10607602 | 21.433363 | down | Ppef1         | protein phosphatase with EF hand calcium-binding domain 1    |
| 10519140 | 21.416983 | down | Mmp23         | matrix metallopeptidase 23                                   |

## Sheet1

|          |                |               |                                                                    |
|----------|----------------|---------------|--------------------------------------------------------------------|
| 10516765 | 21.298313 up   | Serinc2       | serine incorporator 2   hypothetical protein LOC100044221          |
| 10411229 | 21.291246 down | F2r           | coagulation factor II (thrombin) receptor                          |
| 10518147 | 21.143286 down | Pdpn          | podoplanin                                                         |
| 10435704 | 21.134819 down | Cd80          | CD80 antigen                                                       |
| 10544596 | 21.082214 up   | Tmem176b      | transmembrane protein 176B                                         |
| 10565794 | 20.72043 down  | Serpinh1      | serine (or cysteine) peptidase inhibitor, clade H, member 1        |
| 10541683 | 20.571568 down | C1r C1rb      | complement component 1, r subcomponent   complement component C1rb |
| 10496872 | 20.536297 down | Eltf1         | EGF, latrophilin seven transmembrane domain containing 1           |
| 10446553 | 20.357607 down | Epb4.1l3      | erythrocyte protein band 4.1-like 3                                |
| 10453759 | 20.21703 down  |               |                                                                    |
| 10509992 | 20.20041 down  | Hspb7         | heat shock protein family, member 7 (cardiovascular)               |
| 10487441 | 20.162285 up   | Mal           | myelin and lymphocyte protein, T-cell differentiation protein      |
| 10483353 | 20.134367 down | Scn7a         | sodium channel, voltage-gated, type VII, alpha                     |
| 10374083 | 20.057035 down | Aebp1         | AE binding protein 1                                               |
| 10489878 | 20.02796 down  | Ptgis         | prostaglandin I2 (prostacyclin) synthase                           |
| 10603151 | 19.910213 up   | Gpm6b         | glycoprotein m6b                                                   |
| 10584827 | 19.904213 up   | Mpzl2         | myelin protein zero-like 2                                         |
| 10548905 | 19.66834 down  | Eps8          | epidermal growth factor receptor pathway substrate 8               |
| 10379765 | 19.666111 up   | Hnf1b         | HNF1 homeobox B                                                    |
| 10475932 | 19.661856 down | Fbln7         | fibulin 7                                                          |
| 10412921 | 19.525185 down | Nid2          | nidogen 2                                                          |
| 10400006 | 19.365437 up   | Ahr           | aryl-hydrocarbon receptor                                          |
| 10402211 | 19.076475 down | Fbln5         | fibulin 5                                                          |
| 10490989 | 18.987621 up   | Cp            | ceruloplasmin                                                      |
| 10370037 | 18.840302 down | Mmp11         | matrix metalloproteinase 11                                        |
| 10461629 | 18.737463 down | Ms4a4d        | membrane-spanning 4-domains, subfamily A, member 4D                |
| 10480090 | 18.598612 down | Itga8         | integrin alpha 8                                                   |
| 10475643 | 18.567066 down | Fgf7          | fibroblast growth factor 7                                         |
| 10348632 | 18.52007 down  | Twist2        | twist homolog 2 (Drosophila)                                       |
| 10391332 | 18.26633 down  | Ptrf          | polymerase I and transcript release factor                         |
| 10440002 | 18.195902 up   | Gpr128        | G protein-coupled receptor 128                                     |
| 10421932 | 18.195173 down | Pcdh9         | protocadherin 9                                                    |
| 10462035 | 18.165592 down | Ldhb          | lactate dehydrogenase B                                            |
| 10594044 | 18.149784 down | Islr          | immunoglobulin superfamily containing leucine-rich repeat          |
| 10600597 | 18.083403 down | Tmem47        | transmembrane protein 47                                           |
| 10574572 | 18.019522 up   | 2210023G05Rik | RIKEN cDNA 2210023G05 gene                                         |
| 10499891 | 17.859602 up   | Sprr1b        | small proline-rich protein 1B                                      |
| 10512499 | 17.757233 down | Tpm2          | tropomyosin 2, beta                                                |

## Sheet1

|          |            |      |               |                                                                            |
|----------|------------|------|---------------|----------------------------------------------------------------------------|
| 10486102 | 17.621357  | down | Gpr176        | G protein-coupled receptor 176                                             |
| 10500011 | 17.60788   | up   | Tuft1         | tuffelin 1                                                                 |
| 10483081 | 17.602829  | down | Fap           | fibroblast activation protein                                              |
| 10404649 | 17.544188  | up   | Dsp           | desmoplakin                                                                |
| 10450344 | 17.366776  | down | C2            | complement component 2 (within H-2S)                                       |
| 10361887 | 16.823338  | up   | Perp          | PERP, TP53 apoptosis effector                                              |
| 10385583 | 16.743645  | up   | Ltc4s         | leukotriene C4 synthase                                                    |
| 10545974 | 16.703953  | down | Antxr1        | anthrax toxin receptor 1                                                   |
| 10536635 | 16.672401  | down | A430107O13Rik | RIKEN cDNA A430107O13 gene                                                 |
| 10506488 | 16.613089  | down | Ppap2b        | phosphatidic acid phosphatase type 2B                                      |
| 10398326 | 16.280994  | down | Meg3          | maternally expressed 3                                                     |
| 10416406 | 16.2513    | down | Htr2a         | 5-hydroxytryptamine (serotonin) receptor 2A                                |
| 10360377 | 16.203106  | down | Al607873      |                                                                            |
| 10458028 | 16.167532  | down | Gypc          | glycophorin C                                                              |
| 10346882 | 16.153223  | down | Adam23        | a disintegrin and metallopeptidase domain 23                               |
| 10541075 | 16.093292  | down | Cxcl12        | chemokine (C-X-C motif) ligand 12                                          |
| 10606928 | 16.078602  | up   | Serpina7      | serine (or cysteine) peptidase inhibitor, member 7                         |
| 10427796 | 15.96912   | down | Npr3          | natriuretic peptide receptor 3                                             |
| 10558192 | 15.951985  | up   | 5430419D17Rik | RIKEN cDNA 5430419D17 gene                                                 |
| 10523145 | 15.891952  | up   | Cxcl15        | chemokine (C-X-C motif) ligand 15                                          |
| 10395925 | 15.742743  | up   | Mia2          | melanoma inhibitory activity 2                                             |
| 10474419 | 15.4849825 | up   | Lgr4          | leucine-rich repeat-containing G protein-coupled receptor 4                |
| 10570741 | 15.356975  | up   | Defb1         | defensin beta 1                                                            |
| 10513208 | 15.347299  | down | Svep1         | sushi, von Willebrand factor type A, EGF and pentraxin domain containing 1 |
| 10384398 | 15.297622  | down | Grb10         | growth factor receptor bound protein 10                                    |
| 10542965 | 15.288216  | down | Sgce          | sarcoglycan, epsilon                                                       |
| 10458828 | 15.0760145 | down | Cdo1          | cysteine dioxygenase 1, cytosolic                                          |
| 10351491 | 14.90509   | down | Olfml2b       | olfactomedin-like 2B                                                       |
| 10421924 | 14.903051  | down | Pcdh9         | protocadherin 9                                                            |
| 10502451 | 14.894197  | up   | Bmpr1b        | bone morphogenetic protein receptor, type 1B                               |
| 10484371 | 14.891076  | down | Calcr         | calcitonin receptor-like                                                   |
| 10551852 | 14.873245  | down | Clip3         | CAP-GLY domain containing linker protein 3                                 |
| 10412335 | 14.781944  | down | Isl1          | ISL1 transcription factor, LIM/homeodomain                                 |
| 10368947 | 14.641821  | up   | Aim1          | absent in melanoma 1                                                       |
| 10460541 | 14.609482  | down | Cd248         | CD248 antigen, endosialin                                                  |
| 10603099 | 14.5998125 | down | Figf          | c-fos induced growth factor                                                |
| 10484463 | 14.339907  | down | Serping1      | serine (or cysteine) peptidase inhibitor, clade G, member 1                |
| 10372410 | 14.284368  | up   | Glpr1         | GLI pathogenesis-related 1 (glioma)                                        |

## Sheet1

|          |            |      |               |                                                                                    |
|----------|------------|------|---------------|------------------------------------------------------------------------------------|
| 10569714 | 14.235803  | down | Cacng7        | calcium channel, voltage-dependent, gamma subunit 7                                |
| 10514177 | 14.196324  | down | Bnc2          | basonuclin 2                                                                       |
| 10603814 | 14.132738  | up   | Slc9a7        | solute carrier family 9 (sodium/hydrogen exchanger), member 7                      |
| 10358879 | 14.122736  | down | Npl           | N-acetylneuraminase pyruvate lyase                                                 |
| 10532085 | 14.11617   | down | Tgfr3         | transforming growth factor, beta receptor III                                      |
| 10471486 | 14.086961  | down | Eng           | endoglin                                                                           |
| 10556297 | 14.012369  | down | Adm           | adrenomedullin                                                                     |
| 10555174 | 13.925281  | down | Lrrc32        | leucine rich repeat containing 32                                                  |
| 10501827 | 13.902029  | down | A730020M07Rik | RIKEN cDNA A730020M07 gene                                                         |
| 10587331 | 13.854663  | up   | Gsta1         | glutathione S-transferase, alpha 1 (Ya)                                            |
| 10364072 | 13.8379135 | down | Ggt5          | gamma-glutamyltransferase 5                                                        |
| 10398364 | 13.812347  | down |               |                                                                                    |
| 10601659 | 13.807518  | down | Srxp2         | sushi-repeat-containing protein, X-linked 2                                        |
| 10514054 | 13.756213  | up   | Nfib          | nuclear factor I/B                                                                 |
| 10353102 | 13.617197  | down | Cpa6          | carboxypeptidase A6                                                                |
| 10428388 | 13.536384  | down | Rspo2         | R-spondin 2 homolog (Xenopus laevis)                                               |
| 10487040 | 13.449256  | down | Fbn1          | fibrillin 1                                                                        |
| 10534862 | 13.404434  | down | Pcolce        | procollagen C-endopeptidase enhancer protein                                       |
| 10541678 | 13.2530575 | down | C1r           | complement component 1, r subcomponent                                             |
| 10369481 | 13.250662  | down | H2afy2        | H2A histone family, member Y2                                                      |
| 10584561 | 13.24177   | down | 9030425E11Rik | RIKEN cDNA 9030425E11 gene                                                         |
| 10498018 | 13.176252  | down | Pcdh18        | protocadherin 18                                                                   |
| 10389214 | 13.125527  | down | Ccl9          | chemokine (C-C motif) ligand 9                                                     |
| 10435733 | 13.122252  | up   | Igsf11        | immunoglobulin superfamily, member 11                                              |
| 10476740 | 13.097225  | up   | Slc24a3       | solute carrier family 24 (sodium/potassium/calcium exchanger), member 3            |
| 10419578 | 13.031708  | down | Ndrp2         | N-myc downstream regulated gene 2                                                  |
| 10485624 | 13.006913  | up   | Prrg4         | proline rich Gla (G-carboxyglutamic acid) 4 (transmembrane)                        |
| 10451838 | 12.981904  | down | Slc5a7        | solute carrier family 5 (choline transporter), member 7                            |
| 10570957 | 12.9298115 | down | Sfrp1         | secreted frizzled-related protein 1                                                |
| 10409833 | 12.802704  | down | Gas1          | growth arrest specific 1                                                           |
| 10350753 | 12.7499275 | up   | Glul          | glutamate-ammonia ligase (glutamine synthetase)                                    |
| 10587323 | 12.728862  | up   | Gsta1 Gsta2   | glutathione S-transferase, alpha 1 (Ya)   glutathione S-transferase, alpha 2 (Yc2) |
| 10472034 | 12.72675   | down | Lypd6         | LY6/PLAUR domain containing 6                                                      |
| 10381371 | 12.692665  | down | Aoc3 Aoc2     | amine oxidase, copper containing 3   amine oxidase, copper containing 2            |
| 10374453 | 12.578129  | up   | Glul          | glutamate-ammonia ligase (glutamine synthetase)                                    |
| 10349648 | 12.573062  | up   | Ctse          | cathepsin E                                                                        |
| 10393379 | 12.563325  | down | Mxra7         | matrix-remodelling associated 7                                                    |
| 10543791 | 12.49669   | up   | Podxl         | podocalyxin-like                                                                   |

## Sheet1

|          |                 |               |                                                                             |
|----------|-----------------|---------------|-----------------------------------------------------------------------------|
| 10408616 | 12.477095 up    | Slc22a23      | solute carrier family 22, member 23                                         |
| 10568735 | 12.4255905 down | Ebf3          | early B-cell factor 3                                                       |
| 10593219 | 12.41909 down   | Nnmt          | nicotinamide N-methyltransferase                                            |
| 10403584 | 12.416706 down  | Nid1          | nidogen 1                                                                   |
| 10458046 | 12.391083 down  | D0H4S114      | DNA segment, human D4S114                                                   |
| 10502816 | 12.065242 up    | Gipc2         | GIPC PDZ domain containing family, member 2                                 |
| 10549222 | 12.045351 down  | Bcat1         | branched chain aminotransferase 1, cytosolic                                |
| 10581175 | 11.958956 down  | C76566        |                                                                             |
| 10375175 | 11.936991 down  | Slit3         | slit homolog 3 (Drosophila)                                                 |
| 10393364 | 11.874263 down  | Cygb          | cytoglobin                                                                  |
| 10599348 | 11.698755 down  | Gria3         | glutamate receptor, ionotropic, AMPA3 (alpha 3)                             |
| 10408798 | 11.627905 up    | Tcfap2a       | transcription factor AP-2, alpha                                            |
| 10396270 | 11.489685 down  | Dact1         | dapper homolog 1, antagonist of beta-catenin (xenopus)                      |
| 10429114 | 11.45981 up     | Tmem71        | transmembrane protein 71                                                    |
| 10534395 | 11.39072 up     | Cldn4         | claudin 4                                                                   |
| 10415413 | 11.345996 down  | BC030046      |                                                                             |
| 10502748 | 11.317849 down  | Lphn2         | latrophilin 2                                                               |
| 10416800 | 11.203673 up    | Lmo7          | LIM domain only 7                                                           |
| 10559207 | 11.139025 down  | Lsp1          | lymphocyte specific 1                                                       |
| 10546725 | 10.966109 down  | Pdzrn3        | PDZ domain containing RING finger 3                                         |
| 10355403 | 10.91148 down   | Fn1           | fibronectin 1                                                               |
| 10345921 | 10.89952 down   | 1500015O10Rik | RIKEN cDNA 1500015O10 gene                                                  |
| 10523190 | 10.887581 up    | 9130213B05Rik | RIKEN cDNA 9130213B05 gene                                                  |
| 10606735 | 10.838994 down  | Armcx2        | armadillo repeat containing, X-linked 2                                     |
| 10427026 | 10.802946 down  | Grasp         | GRP1 (general receptor for phosphoinositides 1)-associated scaffold protein |
| 10523260 | 10.789269 up    | Shroom3       | shroom family member 3                                                      |
| 10585703 | 10.756095 down  | Rpp25         | ribonuclease P 25 subunit (human)                                           |
| 10500808 | 10.673512 down  | Olfml3        | olfactomedin-like 3                                                         |
| 10370210 | 10.639538 down  | Col6a1        | collagen, type VI, alpha 1                                                  |
| 10412380 | 10.590998 up    |               |                                                                             |
| 10354003 | 10.556043 up    | Mgat4a        | mannoside acetylglucosaminyltransferase 4, isoenzyme A                      |
| 10519857 | 10.514915 down  | Hgf           | hepatocyte growth factor                                                    |
| 10437655 | 10.492661 down  | BC068110      |                                                                             |
| 10368243 | 10.43485 down   | Eya4          | eyes absent 4 homolog (Drosophila)                                          |
| 10548879 | 10.429112 down  | Mgp           | matrix Gla protein                                                          |
| 10487645 | 10.387305 down  | Cpxm1         | carboxypeptidase X 1 (M14 family)                                           |
| 10471247 | 10.383258 up    | 2810003C17Rik | RIKEN cDNA 2810003C17 gene                                                  |
| 10599736 | 10.364931 down  | Fhl1          | four and a half LIM domains 1                                               |

## Sheet1

|          |           |      |          |                                                                            |
|----------|-----------|------|----------|----------------------------------------------------------------------------|
| 10498379 | 10.326671 | down | Igsf10   | immunoglobulin superfamily, member 10                                      |
| 10475544 | 10.281827 | down | Sema6d   | sema domain, transmembrane domain, cytoplasmic domain, (semaphorin) 6D     |
| 10503382 | 10.27581  | down | Runx1t1  | runt-related transcription factor 1; translocated to, 1 (cyclin D-related) |
| 10511580 | 10.130841 | down | Ppm2c    | protein phosphatase 2C, magnesium dependent, catalytic subunit             |
| 10344897 | 10.119938 | down | Sulf1    | sulfatase 1                                                                |
| 10542575 | 10.107292 | down | Pde3a    | phosphodiesterase 3A, cGMP inhibited                                       |
| 10472820 | 10.076181 | up   | Itga6    | integrin alpha 6                                                           |
| 10395457 | 10.063159 | down | Etv1     | ets variant gene 1                                                         |
| 10359593 | 9.941159  | down | Fmo3     | flavin containing monooxygenase 3                                          |
| 10380614 | 9.883097  | up   | Hoxb13   | homeo box B13                                                              |
| 10561712 | 9.851208  | up   | Spint2   | serine protease inhibitor, Kunitz type 2                                   |
| 10434105 | 9.849453  | down | Scarf2   | scavenger receptor class F, member 2                                       |
| 10578880 | 9.845586  | down | Tll1     | tolloid-like                                                               |
| 10445241 | 9.834038  | up   | Tnfrsf21 | tumor necrosis factor receptor superfamily, member 21                      |
| 10351455 | 9.806993  | up   | Rgs5     | regulator of G-protein signaling 5                                         |
| 10502774 | 9.660846  | down | Lphn2    | latrophilin 2                                                              |
| 10394990 | 9.655713  | up   | Mboat2   | membrane bound O-acyltransferase domain containing 2                       |
| 10559385 | 9.646064  | down | Mrgprf   | MAS-related GPR, member F                                                  |
| 10481518 | 9.56218   | up   | Ptges    | prostaglandin E synthase                                                   |
| 10470775 | 9.539867  | down | Cercam   | cerebral endothelial cell adhesion molecule                                |
| 10371332 | 9.53057   | down | Aldh1l2  | aldehyde dehydrogenase 1 family, member L2                                 |
| 10385391 | 9.419077  | up   | Cyfp2    | cytoplasmic FMR1 interacting protein 2                                     |
| 10587150 | 9.3573065 | up   | Myo5c    | myosin VC                                                                  |
| 10549097 | 9.3004675 | down | Ldhb     | lactate dehydrogenase B                                                    |
| 10438708 | 9.257642  | down | Masp1    | mannan-binding lectin serine peptidase 1                                   |
| 10461869 | 9.204645  | up   | Prune2   | prune homolog 2 (Drosophila)                                               |
| 10406934 | 9.187114  | down | Etv1     | ets variant gene 1                                                         |
| 10575034 | 9.176998  | down | Cdh3     | cadherin 3                                                                 |
| 10447190 | 9.175525  | down | Plekhh2  | pleckstrin homology domain containing, family H member 2                   |
| 10391052 | 9.171434  | up   | Krt14    | keratin 14                                                                 |
| 10514049 | 9.149523  | up   | Nfib     | nuclear factor I/B                                                         |
| 10498647 | 8.999073  | down | B3galnt1 | UDP-GalNAc:betaGlcNAc beta 1,3-galactosaminyltransferase, polypeptide 1    |
| 10415411 | 8.998711  | down | BC030046 |                                                                            |
| 10374406 | 8.992012  | down | Cnrip1   | cannabinoid receptor interacting protein 1                                 |
| 10404783 | 8.984142  | down | Edn1     | endothelin 1                                                               |
| 10439009 | 8.967739  | down | Apod     | apolipoprotein D                                                           |
| 10575873 | 8.92751   | up   | Osgin1   | oxidative stress induced growth inhibitor 1                                |
| 10366707 | 8.918631  | down | Avpr1a   | arginine vasopressin receptor 1A                                           |



## Sheet1

|          |                |               |                                                                                 |
|----------|----------------|---------------|---------------------------------------------------------------------------------|
| 10350506 | 8.891196 up    | B830045N13Rik | RIKEN cDNA B830045N13 gene                                                      |
| 10544798 | 8.8261175 down | Hoxa10        | homeo box A10                                                                   |
| 10509838 | 8.815118 up    | Padi2         | peptidyl arginine deiminase, type II                                            |
| 10518526 | 8.769444 down  | Angptl7       | angiopoietin-like 7                                                             |
| 10547869 | 8.74895 down   | Leprel2       | leprecan-like 2                                                                 |
| 10597575 | 8.707449 down  | Plcd1         | phospholipase C, delta 1                                                        |
| 10454881 | 8.68668 up     | 0610010O12Rik | RIKEN cDNA 0610010O12 gene                                                      |
| 10573115 | 8.632779 down  | Rnf150        | ring finger protein 150                                                         |
| 10439218 | 8.612425 down  | Pdia5         | protein disulfide isomerase associated 5                                        |
| 10509965 | 8.607994 up    | Epha2         | Eph receptor A2                                                                 |
| 10516487 | 8.607849 up    | Gjb4          | gap junction protein, beta 4                                                    |
| 10535807 | 8.549299 down  | Flt1          | FMS-like tyrosine kinase 1                                                      |
| 10494978 | 8.5442 up      | Ptpn22        | protein tyrosine phosphatase, non-receptor type 22 (lymphoid)                   |
| 10363735 | 8.521658 down  | Egr2          | early growth response 2                                                         |
| 10357965 | 8.480736 up    | Lgr6          | leucine-rich repeat-containing G protein-coupled receptor 6                     |
| 10422728 | 8.471141 down  | Dab2          | disabled homolog 2 (Drosophila)                                                 |
| 10504375 | 8.447113 down  | Npr2          | natriuretic peptide receptor 2                                                  |
| 10544801 | 8.439857 down  | Hoxa11        | homeo box A11                                                                   |
| 10544610 | 8.42251 down   | Igf2bp3       | insulin-like growth factor 2 mRNA binding protein 3                             |
| 10452648 | 8.415378 down  | Emilin2       | elastin microfibril interfacier 2                                               |
| 10375360 | 8.396116 down  | Ebf1          | early B-cell factor 1                                                           |
| 10409876 | 8.367498 down  | Ctla2a        | cytotoxic T lymphocyte-associated protein 2 alpha                               |
| 10426081 | 8.340776 up    | AW049604      |                                                                                 |
| 10602840 | 8.296631 down  | Sh3kbp1       | SH3-domain kinase binding protein 1                                             |
| 10587503 | 8.283311 up    | Sh3bgrl2      | SH3 domain binding glutamic acid-rich protein like 2                            |
| 10412298 | 8.273882 down  | Itga1         | integrin alpha 1                                                                |
| 10404439 | 8.254917 up    | Serpinh9b     | serine (or cysteine) peptidase inhibitor, clade B, member 9b                    |
| 10502830 | 8.199779 down  | Nexn          | nexilin                                                                         |
| 10544805 | 8.180805 down  | Hoxa13        | homeo box A13                                                                   |
| 10498024 | 8.180329 up    | Slc7a11       | solute carrier family 7 (cationic amino acid transporter, y+ system), member 11 |
| 10499932 | 8.171139 up    | Lce1h         | late cornified envelope 1H                                                      |
| 10467013 | 8.169942 down  | Prkg1         | protein kinase, cGMP-dependent, type I                                          |
| 10366293 | 8.151084 down  | Csrp2         | cysteine and glycine-rich protein 2                                             |
| 10416057 | 8.149338 up    | Clu           | clusterin                                                                       |
| 10346015 | 8.148487 down  | Col3a1        | collagen, type III, alpha 1                                                     |
| 10595680 | 8.145355 down  | Tbc1d2b       | TBC1 domain family, member 2B                                                   |
| 10529656 | 8.121574 down  | Nsg1          | neuron specific gene family member 1                                            |
| 10375667 | 8.105956 down  | Rnf130        | ring finger protein 130                                                         |

## Sheet1

|          |                |                |                                                          |
|----------|----------------|----------------|----------------------------------------------------------|
| 10407445 | 8.089977 up    | Akr1c12        | aldo-keto reductase family 1, member C12                 |
| 10354432 | 7.993532 down  | Myo1b          | myosin IB                                                |
| 10398665 | 7.9870753 down | Tnfaip2        | tumor necrosis factor, alpha-induced protein 2           |
| 10459225 | 7.9867535 down |                |                                                          |
| 10391119 | 7.9753156 down | 1110036O03Rik  | RIKEN cDNA 1110036O03 gene                               |
| 10548687 | 7.9362354 down | EG545886       |                                                          |
| 10358733 | 7.9037576 down | Rgl1           | ral guanine nucleotide dissociation stimulator,-like 1   |
| 10344981 | 7.8657484 down | Pi15           | peptidase inhibitor 15                                   |
| 10415408 | 7.852402 down  | BC030046       |                                                          |
| 10370587 | 7.8032475 down | Shc2           | src homology 2 domain-containing transforming protein C2 |
| 10499873 | 7.7672873 up   | A030004J04Rik  | RIKEN cDNA A030004J04 gene                               |
| 10529875 | 7.7637963 down | Ldb2           | LIM domain binding 2                                     |
| 10426812 | 7.7509103 up   | Gpd1           | glycerol-3-phosphate dehydrogenase 1 (soluble)           |
| 10400143 | 7.743093 up    | Stxbp6         | syntaxin binding protein 6 (amisyn)                      |
| 10474936 | 7.7367 up      | Spint1         | serine protease inhibitor, Kunitz type 1                 |
| 10413710 | 7.7327833 down | Nt5dc2         | 5'-nucleotidase domain containing 2                      |
| 10361771 | 7.7314367 down | Plagl1         | pleiomorphic adenoma gene-like 1                         |
| 10557960 | 7.7066407 down | Tgfb1i1        | transforming growth factor beta 1 induced transcript 1   |
| 10530029 | 7.6370115 down | Lgi2           | leucine-rich repeat LGI family, member 2                 |
| 10367772 | 7.6289105 up   | Samd5          | sterile alpha motif domain containing 5                  |
| 10423825 | 7.6052027 up   | Fzd6           | frizzled homolog 6 (Drosophila)                          |
| 10541753 | 7.5998154 down | C530028O21Rik  | RIKEN cDNA C530028O21 gene                               |
| 10398432 | 7.578622 down  |                |                                                          |
| 10565935 | 7.549394 down  | Arhgef17       | Rho guanine nucleotide exchange factor (GEF) 17          |
| 10446763 | 7.5368285 down | Lbh LOC1000483 | limb-bud and heart   similar to limb-bud and heart       |
| 10353346 | 7.525938 up    | Pkhd1          | polycystic kidney and hepatic disease 1                  |
| 10571142 | 7.51845 down   | Gpr124         | G protein-coupled receptor 124                           |
| 10523772 | 7.4758515 up   | Lrrc8d         | leucine rich repeat containing 8D                        |
| 10433776 | 7.4444823 down | Snai2          | snail homolog 2 (Drosophila)                             |
| 10565255 | 7.421002 down  | 9930013L23Rik  | RIKEN cDNA 9930013L23 gene                               |
| 10457587 | 7.414527 down  | Zfp521         | zinc finger protein 521                                  |
| 10396476 | 7.411119 down  | Rhoj           | ras homolog gene family, member J                        |
| 10361186 | 7.3874307 down | Sertad4        | SERTA domain containing 4                                |
| 10382713 | 7.375203 up    | Itgb4          | integrin beta 4                                          |
| 10435712 | 7.351968 down  | Cd80           | CD80 antigen                                             |
| 10400504 | 7.3497252 up   | Foxa1          | forkhead box A1                                          |
| 10350123 | 7.3094406 down | Lmod1          | leiomodulin 1 (smooth muscle)                            |
| 10511333 | 7.270727 down  | Plagl1         | pleiomorphic adenoma gene 1                              |

## Sheet1

|          |           |      |            |                                                                            |
|----------|-----------|------|------------|----------------------------------------------------------------------------|
| 10466712 | 7.246039  | down | Mamdc2     | MAM domain containing 2                                                    |
| 10369932 | 7.2335453 | down | Susd2      | sushi domain containing 2                                                  |
| 10407072 | 7.2320704 | up   | Elovl7     | ELOVL family member 7, elongation of long chain fatty acids (yeast)        |
| 10590073 | 7.2255144 | up   | Vill       | villin-like                                                                |
| 10587241 | 7.2230096 | up   | Hmgcll1    | 3-hydroxymethyl-3-methylglutaryl-Coenzyme A lyase-like 1                   |
| 10521759 | 7.216066  | down | Slit2      | slit homolog 2 (Drosophila)                                                |
| 10373073 | 7.1965637 | down | D10Ert610e | DNA segment, Chr 10, ERATO Doi 610, expressed                              |
| 10485117 | 7.1822157 | down | Creb3l1    | cAMP responsive element binding protein 3-like 1                           |
| 10572130 | 7.1688967 | down | Lpl        | lipoprotein lipase                                                         |
| 10603583 | 7.1302323 | down | Srpx Rpgr  | sushi-repeat-containing protein   retinitis pigmentosa GTPase regulator    |
| 10571907 | 7.126338  | up   | Mfap3l     | microfibrillar-associated protein 3-like                                   |
| 10487894 | 7.1213346 | down | Rassf2     | Ras association (RalGDS/AF-6) domain family member 2                       |
| 10556528 | 7.106383  | down | Pde3b      | phosphodiesterase 3B, cGMP-inhibited                                       |
| 10409866 | 7.054992  | down | Ctla2b     | cytotoxic T lymphocyte-associated protein 2 beta                           |
| 10397633 | 7.001946  | down | Flrt2      | fibronectin leucine rich transmembrane protein 2                           |
| 10584259 | 6.997585  | down | Fez1       | fasciculation and elongation protein zeta 1 (zygin I)                      |
| 10495206 | 6.9699783 | down | Slc16a4    | solute carrier family 16 (monocarboxylic acid transporters), member 4      |
| 10400304 | 6.951212  | down | Egln3      | EGL nine homolog 3 (C. elegans)                                            |
| 10369431 | 6.9465566 | down | Adamts14   | disintegrin-like and metallopeptidase with thrombospondin type 1 motif, 14 |
| 10405343 | 6.9321713 | up   | Tspan17    | tetraspanin 17                                                             |
| 10388389 | 6.9087763 | down | Hic1       | hypermethylated in cancer 1                                                |
| 10607486 | 6.889822  | down | Ptchd1     | patched domain containing 1                                                |
| 10519998 | 6.875702  | down | Lrrc17     | leucine rich repeat containing 17                                          |
| 10604528 | 6.8588715 | up   | Mbnl3      | muscleblind-like 3 (Drosophila)                                            |
| 10508614 | 6.813407  | down | Fabp3      | fatty acid binding protein 3, muscle and heart                             |
| 10478048 | 6.8020844 | up   | Lbp        | lipopolysaccharide binding protein                                         |
| 10554945 | 6.793367  | down | Prp        | prolylcarboxypeptidase (angiotensinase C)                                  |
| 10468668 | 6.793075  | up   | Afap1l2    | actin filament associated protein 1-like 2                                 |
| 10423505 | 6.7677827 | up   | Cdbl       | carboxymethylenebutenolidase-like (Pseudomonas)                            |
| 10399691 | 6.7515535 | up   | Id2        | inhibitor of DNA binding 2                                                 |
| 10404913 | 6.7502837 | down | Cap2       | CAP, adenylate cyclase-associated protein, 2 (yeast)                       |
| 10406598 | 6.7144165 | up   | Serinc5    | serine incorporator 5                                                      |
| 10576049 | 6.709214  | down | Foxf1a     | forkhead box F1a                                                           |
| 10568873 | 6.6851597 | up   | Adam8      | a disintegrin and metallopeptidase domain 8                                |
| 10410995 | 6.6728616 | up   | Rasgrf2    | RAS protein-specific guanine nucleotide-releasing factor 2                 |
| 10362091 | 6.6369953 | down | Raet1d     | retinoic acid early transcript delta                                       |
| 10401527 | 6.597974  | down | Ltbp2      | latent transforming growth factor beta binding protein 2                   |
| 10495763 | 6.5913997 | up   | Gclm       | glutamate-cysteine ligase , modifier subunit                               |

## Sheet1

|          |           |      |               |                                                             |
|----------|-----------|------|---------------|-------------------------------------------------------------|
| 10480139 | 6.58783   | down | C1ql3         | C1q-like 3                                                  |
| 10402708 | 6.5846276 | down | Ckb           | creatine kinase, brain                                      |
| 10395596 | 6.5729275 | down | Foxg1         | forkhead box G1                                             |
| 10345762 | 6.5354247 | down | Il1r1         | interleukin 1 receptor, type I                              |
| 10469066 | 6.533306  | down | Ccdc3         | coiled-coil domain containing 3                             |
| 10507099 | 6.509196  | up   | OTTMUSG000001 | predicted gene, OTTMUSG00000008561                          |
| 10450982 | 6.4963    | up   | Gpr115        | G protein-coupled receptor 115                              |
| 10496425 | 6.4772444 | up   | Adh7          | alcohol dehydrogenase 7 (class IV), mu or sigma polypeptide |
| 10495781 | 6.4691124 | up   | Bcar3         | breast cancer anti-estrogen resistance 3                    |
| 10578810 | 6.461238  | up   | Clcn3         | chloride channel 3                                          |
| 10503334 | 6.4558735 | down | Gem           | GTP binding protein (gene overexpressed in skeletal muscle) |
| 10517488 | 6.4273334 | down | Ephb2         | Eph receptor B2                                             |
| 10406676 | 6.392821  | up   | Lhfp12        | lipoma HMGIC fusion partner-like 2                          |
| 10357488 | 6.384227  | up   | Cd55          | CD55 antigen                                                |
| 10575497 | 6.3709364 | down | BC060632      |                                                             |
| 10357249 | 6.3650327 | down | Steap3 Steap1 | STEAP family member 3   1                                   |
| 10573319 | 6.3286347 | down | Podnl1        | podocan-like 1                                              |
| 10586079 | 6.3060594 | down | Itga11        | integrin, alpha 11                                          |
| 10398420 | 6.271719  | down |               |                                                             |
| 10547153 | 6.248913  | up   | Alox5         | arachidonate 5-lipoxygenase                                 |
| 10567043 | 6.232189  | up   | Rras2         | related RAS viral (r-ras) oncogene homolog 2                |
| 10545458 | 6.1911283 | down | Tcf3          | transcription factor 3                                      |
| 10587339 | 6.183637  | up   | Gsta2 Gsta1   | predicted gene, ENSMUSG00000074179                          |
| 10431210 | 6.1538916 | up   | Wnt7b         | wingless-related MMTV integration site 7B                   |
| 10367400 | 6.1148257 | down | Mmp19         | matrix metalloproteinase 19                                 |
| 10501063 | 6.108297  | down | Cd53          | CD53 antigen                                                |
| 10491477 | 6.088679  | up   | Sox2          | SRY-box containing gene 2                                   |
| 10513256 | 6.0867047 | down | Lpar1         | lysophosphatidic acid receptor 1                            |
| 10367634 | 6.038787  | down | Akap12        | A kinase (PRKA) anchor protein (gravin) 12                  |
| 10461408 | 6.0366516 | down | Rab3il1       | RAB3A interacting protein (rabin3)-like 1                   |
| 10385175 | 6.0302305 | up   | Wwc1          | WW, C2 and coiled-coil domain containing 1                  |
| 10563085 | 6.0258017 | down | Fcgrt         | Fc receptor, IgG, alpha chain transporter                   |
| 10371379 | 6.013474  | down | Nuak1         | NUAK family, SNF1-like kinase, 1                            |
| 10468980 | 6.0082946 | up   | 3110001A13Rik | RIKEN cDNA 3110001A13 gene                                  |
| 10587383 | 6.0049534 | down | Cd109         | CD109 antigen                                               |
| 10509267 | 6.000953  | up   | Wnt4          | wingless-related MMTV integration site 4                    |
| 10411595 | 5.9904723 | up   | Naip2         | NLR family, apoptosis inhibitory protein 2                  |
| 10535053 | 5.9823422 | down | Prkar1b       | protein kinase, cAMP dependent regulatory, type I beta      |

## Sheet1

|          |                |               |                                                                           |
|----------|----------------|---------------|---------------------------------------------------------------------------|
| 10558840 | 5.9730105 up   | Rassf7        | Ras association (RalGDS/AF-6) domain family (N-terminal) member 7         |
| 10371296 | 5.962332 down  | Glt8d2        | glycosyltransferase 8 domain containing 2                                 |
| 10549733 | 5.954628 down  | A430110N23Rik | RIKEN cDNA A430110N23 gene                                                |
| 10428857 | 5.9526267 down | Mtss1         | metastasis suppressor 1                                                   |
| 10429140 | 5.9426875 up   | Ndrp1         | N-myc downstream regulated gene 1                                         |
| 10586591 | 5.9298244 up   | Car12         | carbonic anhydrase 12                                                     |
| 10547807 | 5.9280095 down | Eno2          | enolase 2, gamma neuronal                                                 |
| 10418171 | 5.922984 down  | 2310047A01Rik | RIKEN cDNA 2310047A01 gene                                                |
| 10399588 | 5.906053 down  | Zfp125        | zinc finger protein 125                                                   |
| 10441270 | 5.892525 up    | Ripk4         | receptor-interacting serine-threonine kinase 4                            |
| 10362097 | 5.888188 down  | Raet1b H60b   | retinoic acid early transcript beta   histocompatibility 60b              |
| 10399337 | 5.877167 down  | Klhl29        | kelch-like 29 (Drosophila)                                                |
| 10526120 | 5.8756113 down | Tpst1         | protein-tyrosine sulfotransferase 1                                       |
| 10399908 | 5.872443 down  | Prkar2b       | protein kinase, cAMP dependent regulatory, type II beta                   |
| 10601874 | 5.8688784 down | Tceal3        | transcription elongation factor A (SII)-like 3                            |
| 10368317 | 5.852396 down  | Enpp3         | ectonucleotide pyrophosphatase/phosphodiesterase 3                        |
| 10520604 | 5.839489 down  | Emilin1       | elastin microfibril interfacer 1                                          |
| 10475314 | 5.8321 down    | Mtap1a        | microtubule-associated protein 1 A                                        |
| 10488322 | 5.7964845 up   | A230067G21Rik | RIKEN cDNA A230067G21 gene                                                |
| 10431872 | 5.785192 up    | Slc38a1       | solute carrier family 38, member 1                                        |
| 10449284 | 5.7406363 down | Dusp1         | dual specificity phosphatase 1                                            |
| 10500276 | 5.728131 down  | BC028528      |                                                                           |
| 10367982 | 5.6992807 up   | Gpr126        | G protein-coupled receptor 126                                            |
| 10493850 | 5.6728215 up   | Spr2a         | small proline-rich protein 2A   hypothetical protein LOC100042514         |
| 10398442 | 5.6652856 down | Mirg          | miRNA containing gene                                                     |
| 10472136 | 5.6644597 down | Galnt13       | UDP-N-acetyl-alpha-D-galactosamine                                        |
| 10490551 | 5.651149 up    | Nkain4        | Na <sup>+</sup> /K <sup>+</sup> transporting ATPase interacting 4         |
| 10349562 | 5.650564 up    | AA986860      |                                                                           |
| 10445640 | 5.650482 down  | Trerf1        | transcriptional regulating factor 1                                       |
| 10573865 | 5.642931 up    | LOC433762     |                                                                           |
| 10508800 | 5.626384 up    | LOC433762     |                                                                           |
| 10424905 | 5.6218076 up   | Scx           | scleraxis                                                                 |
| 10505489 | 5.6171827 down | Pappa         | pregnancy-associated plasma protein A                                     |
| 10412517 | 5.6074758 down | ENSMUSG00000  | predicted gene, ENSMUSG00000057445                                        |
| 10519693 | 5.5886583 down | Sema3d        | sema domain, immunoglobulin domain (Ig), (semaphorin) 3D                  |
| 10469695 | 5.5573173 down | Apbb1ip       | amyloid beta (A4) precursor protein-binding, member 1 interacting protein |
| 10542470 | 5.5416365 up   | Mgst1         | microsomal glutathione S-transferase 1                                    |
| 10482929 | 5.533481 up    | Ly75          | lymphocyte antigen 75                                                     |

## Sheet1

|          |           |      |               |                                                                           |
|----------|-----------|------|---------------|---------------------------------------------------------------------------|
| 10451932 | 5.5034513 | down | S3-12         |                                                                           |
| 10404975 | 5.488135  | down | Id4           | inhibitor of DNA binding 4                                                |
| 10595148 | 5.486755  | up   | Gsta2         | glutathione S-transferase, alpha 2 (Yc2)                                  |
| 10483719 | 5.439731  | down | Chn1          | chimerin (chimaerin) 1                                                    |
| 10400170 | 5.429444  | down | Prkd1         | protein kinase D1                                                         |
| 10514240 | 5.4285703 | up   | Slc24a2       | solute carrier family 24 (sodium/potassium/calcium exchanger), member 2   |
| 10468762 | 5.4208317 | up   | 4930506M07Rik | RIKEN cDNA 4930506M07 gene                                                |
| 10359582 | 5.4087515 | down | Fmo2          | flavin containing monooxygenase 2                                         |
| 10385236 | 5.397117  | up   | Akr1b3        | aldo-keto reductase family 1, member B3 (aldose reductase)                |
| 10412882 | 5.3848796 | down | Thrb          | thyroid hormone receptor beta                                             |
| 10490384 | 5.380377  | up   | Lama5         | laminin, alpha 5                                                          |
| 10575763 | 5.3786006 | up   | Gan           | giant axonal neuropathy                                                   |
| 10523579 | 5.3714976 | down | Arhgap24      | Rho GTPase activating protein 24                                          |
| 10594758 | 5.3629775 | up   | Gcnt3         | glucosaminyl (N-acetyl) transferase 3, mucin type                         |
| 10398362 | 5.3538957 | down | Rian          | RNA imprinted and accumulated in nucleus                                  |
| 10461878 | 5.3501897 | up   | A230083H22Rik | RIKEN cDNA A230083H22 gene                                                |
| 10415396 | 5.3486724 | down | Nfatc4        | nuclear factor of activated T-cells, cytoplasmic, calcineurin-dependent 4 |
| 10451559 | 5.3208327 | up   | 1700001C19Rik | RIKEN cDNA 1700001C19 gene                                                |
| 10484894 | 5.313629  | up   | Ptprj         | protein tyrosine phosphatase, receptor type, J                            |
| 10504534 | 5.313074  | up   | Frmpd1        | FERM and PDZ domain containing 1                                          |
| 10477169 | 5.311596  | up   | Id1           | inhibitor of DNA binding 1                                                |
| 10601844 | 5.296992  | down | Bhlhb9        | basic helix-loop-helix domain containing, class B9                        |
| 10466745 | 5.2893853 | up   | Tjp2          | tight junction protein 2                                                  |
| 10558880 | 5.2820163 | up   | Eps8l2        | EPS8-like 2                                                               |
| 10346838 | 5.2669086 | down | Pard3b        | par-3 partitioning defective 3 homolog B (C. elegans)                     |
| 10483249 | 5.2581234 | up   | Galnt3        | UDP-N-acetyl-alpha-D-galactosamine                                        |
| 10488507 | 5.257044  | up   | Abhd12        | abhydrolase domain containing 12                                          |
| 10542738 | 5.238738  | down | Rassf8        | Ras association (RalGDS/AF-6) domain family (N-terminal) member 8         |
| 10509280 | 5.23529   | down | Hspg2         | perlecan (heparan sulfate proteoglycan 2)                                 |
| 10354768 | 5.231173  | up   | Akr1b3        | aldo-keto reductase family 1, member B3 (aldose reductase)                |
| 10346164 | 5.2267194 | down | Sdpr          | serum deprivation response                                                |
| 10522467 | 5.222304  | down | Rasl11b       | RAS-like, family 11, member B                                             |
| 10489985 | 5.220385  | up   | Atp9a         | ATPase, class II, type 9A                                                 |
| 10384483 | 5.2003794 | up   |               |                                                                           |
| 10543859 | 5.1744604 | up   | Akr1b3        | aldo-keto reductase family 1, member B3 (aldose reductase)                |
| 10519324 | 5.1678185 | up   | Cdk6          | cyclin-dependent kinase 6                                                 |
| 10577712 | 5.1430483 | down | Adam5         | a disintegrin and metallopeptidase domain 5                               |
| 10578045 | 5.1303606 | down | Nrg1          | neuregulin 1                                                              |

## Sheet1

|          |           |      |                     |                                                                                |
|----------|-----------|------|---------------------|--------------------------------------------------------------------------------|
| 10510215 | 5.127799  | down | OTTMUSG00000010657  |                                                                                |
| 10542731 | 5.1037164 | down | Rassf8              | Ras association (RalGDS/AF-6) domain family (N-terminal) member 8              |
| 10372648 | 5.1036725 | down | Lyz2                | lysozyme 2                                                                     |
| 10484888 | 5.097614  | up   | LOC668629 LOC668629 | similar to PTPRJ   similar to protein tyrosine phosphatase, receptor type, J   |
| 10419015 | 5.089548  | up   | Pcdh21              | protocadherin 21                                                               |
| 10558687 | 5.085704  | up   | 1190003J15Rik       | RIKEN cDNA 1190003J15 gene                                                     |
| 10472965 | 5.084776  | down | Hoxd8               | homeo box D8                                                                   |
| 10554752 | 5.0721116 | up   | Nox4                | NADPH oxidase 4                                                                |
| 10425031 | 5.0624647 | up   | Apol6               | apolipoprotein L 6                                                             |
| 10477042 | 5.054744  | down | Angpt4              | angiopoietin 4                                                                 |
| 10479981 | 5.0534773 | up   | Gata3               | GATA binding protein 3                                                         |
| 10464391 | 5.050834  | down | Emx2                | empty spiracles homolog 2 (Drosophila)                                         |
| 10573008 | 5.049512  | down | Zfp827              | zinc finger protein 827                                                        |
| 10499216 | 5.036251  | down | Pear1               | platelet endothelial aggregation receptor 1                                    |
| 10406982 | 5.0211263 | down | Adamts6             | a disintegrin-like and metalloproteinase with thrombospondin type 1 motif, 6   |
| 10476021 | 4.9976716 | down | Sirpa               | signal-regulatory protein alpha                                                |
| 10587799 | 4.9951367 | up   | Plscr2              | phospholipid scramblase 2                                                      |
| 10579012 | 4.98781   | down | Csgalnact1          | chondroitin sulfate N-acetylgalactosaminyltransferase 1                        |
| 10502772 | 4.963924  | down | Lphn2               | latrophilin 2                                                                  |
| 10374777 | 4.9577017 | up   | Efemp1              | epidermal growth factor-containing fibulin-like extracellular matrix protein 1 |
| 10428604 | 4.956145  | down | Tnfrsf11b           | tumor necrosis factor receptor superfamily, member 11b (osteoprotegerin)       |
| 10555235 | 4.949656  | up   | Arrb1               | arrestin, beta 1                                                               |
| 10490777 | 4.942386  | down | Zfx4                | zinc finger homeodomain 4                                                      |
| 10489484 | 4.939977  | up   | Sdc4                | syndecan 4                                                                     |
| 10360863 | 4.938996  | down | Mark1               | MAP/microtubule affinity-regulating kinase 1                                   |
| 10351463 | 4.9214087 | up   | Rgs5                | regulator of G-protein signaling 5                                             |
| 10379153 | 4.9155545 | up   | Aldoc               | aldolase 3, C isoform                                                          |
| 10462231 | 4.9077168 | up   | Dmrt2               | doublesex and mab-3 related transcription factor 2                             |
| 10572897 | 4.887087  | down | Hmox1               | heme oxygenase (decycling) 1                                                   |
| 10478962 | 4.8856173 | up   | 2010011I20Rik       | RIKEN cDNA 2010011I20 gene                                                     |
| 10586250 | 4.87137   | down | Dennd4a             | DENN/MADD domain containing 4A                                                 |
| 10562192 | 4.8553724 | down | Fxyd5               | FXDY domain-containing ion transport regulator 5                               |
| 10598138 | 4.855233  | down | Spry3               | sprouty homolog 3 (Drosophila)                                                 |
| 10423109 | 4.8412614 | down | Adamts12            | a disintegrin-like and metalloproteinase with thrombospondin type 1 motif, 12  |
| 10383025 | 4.84029   | down | C1qtnf1             | C1q and tumor necrosis factor related protein 1                                |
| 10407327 | 4.8299217 | up   | Emb                 | embigin                                                                        |
| 10399465 | 4.825157  | up   | AW125753            |                                                                                |
| 10542880 | 4.819735  | up   | 4833442J19Rik       | RIKEN cDNA 4833442J19 gene                                                     |

## Sheet1

|          |           |      |                  |                                                                            |
|----------|-----------|------|------------------|----------------------------------------------------------------------------|
| 10586248 | 4.8122888 | down | Dennd4a          | DENN/MADD domain containing 4A                                             |
| 10552245 | 4.8032517 | down | Tshz3            | teashirt zinc finger family member 3                                       |
| 10432032 | 4.7979393 | up   | Vdr              | vitamin D receptor                                                         |
| 10565689 | 4.7926154 | up   | Capn5            | calpain 5                                                                  |
| 10605711 | 4.785545  | down | Pdk3             | pyruvate dehydrogenase kinase, isoenzyme 3                                 |
| 10488378 | 4.7752795 | down | Thbd             | thrombomodulin                                                             |
| 10437195 | 4.7724648 | up   | Igsf5 Pcp4       | immunoglobulin superfamily, member 5   Purkinje cell protein 4             |
| 10588263 | 4.767273  | up   | Slco2a1          | solute carrier organic anion transporter family, member 2a1                |
| 10409240 | 4.761398  | up   | Sema4d           | semaphorin 4D                                                              |
| 10378649 | 4.7432904 | up   | Slc43a2          | solute carrier family 43, member 2                                         |
| 10407211 | 4.7352624 | down | Ppap2a           | phosphatidic acid phosphatase 2a                                           |
| 10369531 | 4.725211  | up   | Tspan15          | tetraspanin 15                                                             |
| 10552156 | 4.7234592 | up   | Rhpn2            | rhopilin, Rho GTPase binding protein 2                                     |
| 10435345 | 4.7230034 | down | Mylk             | myosin, light polypeptide kinase                                           |
| 10554269 | 4.717479  | up   | Abhd2            | abhydrolase domain containing 2                                            |
| 10574471 | 4.7077785 | down | Cmtm3            | CKLF-like MARVEL transmembrane domain containing 3                         |
| 10538811 | 4.7029104 | down | Prdm5            | PR domain containing 5                                                     |
| 10368647 | 4.693469  | down | Dse              | dermatan sulfate epimerase                                                 |
| 10444890 | 4.692106  | up   | Ier3             | immediate early response 3                                                 |
| 10591967 | 4.6745524 | down | Jam3             | junction adhesion molecule 3                                               |
| 10544660 | 4.6659284 | up   | Osbpl3           | oxysterol binding protein-like 3                                           |
| 10466976 | 4.665151  | up   | Gldc             | glycine decarboxylase                                                      |
| 10539263 | 4.6644697 | down | Loxl3            | lysyl oxidase-like 3                                                       |
| 10596051 | 4.6567445 | up   | Tmem22           | transmembrane protein 22                                                   |
| 10367945 | 4.650775  | down | Phactr2          | phosphatase and actin regulator 2                                          |
| 10375956 | 4.6380816 | down | Fstl4            | follicle-stimulating hormone receptor-like 4                               |
| 10373571 | 4.637283  | down | 1110012D08Rik    | RIKEN cDNA 1110012D08 gene                                                 |
| 10534718 | 4.6362805 | down | Trip6            | thyroid hormone receptor interactor 6                                      |
| 10516735 | 4.636253  | up   | Tinagl           | tubulointerstitial nephritis antigen-like                                  |
| 10431874 | 4.63625   | up   | Slc38a1          | solute carrier family 38, member 1                                         |
| 10601846 | 4.6344986 | down | 2900062L11Rik 6: | RIKEN cDNA 2900062L11 gene   RIKEN cDNA 6530401D17 gene                    |
| 10536294 | 4.6344023 | down | Peg10            | paternally expressed 10                                                    |
| 10413419 | 4.612745  | up   | Arhgef3          | Rho guanine nucleotide exchange factor (GEF) 3                             |
| 10399457 | 4.6063585 | up   | Akr1b3           | aldo-keto reductase family 1, member B3 (aldose reductase)                 |
| 10490845 | 4.6051617 | up   | Chmp4c           | chromatin modifying protein 4C   similar to chromatin modifying protein 4C |
| 10427035 | 4.60469   | down | Nr4a1            | nuclear receptor subfamily 4, group A, member 1                            |
| 10606389 | 4.6007576 | up   | Gm379            | gene model 379, (NCBI)                                                     |
| 10500295 | 4.596254  | down | Plekho1          | pleckstrin homology domain containing, family O member 1                   |



## Sheet1

|          |                |               |                                                                              |
|----------|----------------|---------------|------------------------------------------------------------------------------|
| 10519747 | 4.596102 up    | Sema3e        | semaphorin 3E                                                                |
| 10347767 | 4.5900993 down | Kcne4         | potassium voltage-gated channel, Isk-related subfamily, gene 4               |
| 10475247 | 4.5884733 up   | Tmem62        | transmembrane protein 62                                                     |
| 10504775 | 4.582517 down  | Col15a1       | collagen, type XV, alpha 1                                                   |
| 10539517 | 4.5787096 down | Dysf          | dysferlin                                                                    |
| 10509273 | 4.575864 up    | Wnt4          | wingless-related MMTV integration site 4                                     |
| 10586244 | 4.5707245 down | Dennd4a       | DENN/MADD domain containing 4A                                               |
| 10395320 | 4.562497 down  | Twist1        | twist gene homolog 1 (Drosophila)                                            |
| 10451710 | 4.5486236 down | Rftn1         | raftlin lipid raft linker 1                                                  |
| 10404702 | 4.544369 up    | Gcnt2         | glucosaminyl (N-acetyl) transferase 2, I-branching enzyme                    |
| 10493856 | 4.5433345 up   | Sprr2a        | small proline-rich protein 2A                                                |
| 10493858 | 4.5403595 up   | Sprr2a        | small proline-rich protein 2A                                                |
| 10558159 | 4.5328593 up   | Dmbt1         | deleted in malignant brain tumors 1                                          |
| 10423333 | 4.5139003 up   | 1810015C04Rik | RIKEN cDNA 1810015C04 gene                                                   |
| 10414537 | 4.503993 down  | Ang Rnase4    | angiogenin, ribonuclease, RNase A family, 5   ribonuclease, RNase A family 4 |
| 10537657 | 4.5022144 up   | Ephb6 Mon2    | Eph receptor B6   MON2 homolog (yeast)                                       |
| 10488060 | 4.4737043 up   | Jag1          | jagged 1                                                                     |
| 10392183 | 4.4620576 up   | Ern1          | endoplasmic reticulum (ER) to nucleus signalling 1                           |
| 10346843 | 4.4563775 down | Nrp2          | neuropilin 2                                                                 |
| 10592067 | 4.445447 down  | Fli1          | Friend leukemia integration 1                                                |
| 10586252 | 4.4376283 down | Dennd4a       | DENN/MADD domain containing 4A                                               |
| 10526566 | 4.436037 down  | Ephb4         | Eph receptor B4                                                              |
| 10555205 | 4.4185743 up   | Gdpd5         | glycerophosphodiester phosphodiesterase domain containing 5                  |
| 10601771 | 4.4182835 down | Armcx1        | armadillo repeat containing, X-linked 1                                      |
| 10362314 | 4.4074583 up   | Ptprk         | protein tyrosine phosphatase, receptor type, K                               |
| 10456653 | 4.4072924 up   | Myo5b         | myosin Vb                                                                    |
| 10468309 | 4.394065 down  | 2310014D11Rik | RIKEN cDNA 2310014D11 gene                                                   |
| 10427898 | 4.384325 down  | Fbxl7         | F-box and leucine-rich repeat protein 7                                      |
| 10586433 | 4.373193 down  | Rbpms2        | RNA binding protein with multiple splicing 2                                 |
| 10387648 | 4.364379 up    | Tmem102       | transmembrane protein 102                                                    |
| 10574676 | 4.362613 down  | Nol3          | nucleolar protein 3 (apoptosis repressor with CARD domain)                   |
| 10586246 | 4.35102 down   | Dennd4a       | DENN/MADD domain containing 4A                                               |
| 10486197 | 4.3455687 up   | Rhov          | ras homolog gene family, member V                                            |
| 10406005 | 4.3339977 up   | Irx2          | Iroquois related homeobox 2 (Drosophila)                                     |
| 10421911 | 4.3260818 down | Pcdh20        | protocadherin 20                                                             |
| 10399470 | 4.32104 down   | Trib2         | tribbles homolog 2 (Drosophila)                                              |
| 10467425 | 4.3131967 down | Sorbs1        | sorbin and SH3 domain containing 1                                           |
| 10573939 | 4.2972355 up   | Lpcat2        | lysophosphatidylcholine acyltransferase 2                                    |

## Sheet1

|          |                |               |                                                                       |
|----------|----------------|---------------|-----------------------------------------------------------------------|
| 10603182 | 4.274309 up    | Arhgap6       | Rho GTPase activating protein 6                                       |
| 10440091 | 4.2588506 down | Col8a1        | collagen, type VIII, alpha 1                                          |
| 10404792 | 4.2587295 down | Phactr1       | phosphatase and actin regulator 1                                     |
| 10452793 | 4.2500944 up   | Galnt14       | UDP-N-acetyl-alpha-D-galactosamine:polypeptide N-AGAT 14              |
| 10350864 | 4.248107 down  | Sec16b        | SEC16 homolog B ( <i>S. cerevisiae</i> )                              |
| 10574166 | 4.2335258 down | Cpne2         | copine II                                                             |
| 10586240 | 4.2308316 down | Dennd4a       | DENN/MADD domain containing 4A                                        |
| 10387170 | 4.230697 down  | Ntn1          | netrin 1   similar to Netrin-1 precursor                              |
| 10467508 | 4.226278 up    | Blnk          | B-cell linker                                                         |
| 10512022 | 4.2173853 up   | Mobk12b       | MOB1, Mps One Binder kinase activator-like 2B (yeast)                 |
| 10481210 | 4.217239 up    | Vav2          | vav 2 oncogene                                                        |
| 10472923 | 4.180605 down  | Ak311         | adenylate kinase 3 alpha-like 1   similar to adenylate kinase 4       |
| 10389775 | 4.17671 up     | Pctp          | phosphatidylcholine transfer protein                                  |
| 10467739 | 4.173979 up    | Avpi1         | arginine vasopressin-induced 1                                        |
| 10503448 | 4.1739693 down | Mmp16         | matrix metalloproteinase 16                                           |
| 10524327 | 4.1731887 down | Mn1           | meningioma 1                                                          |
| 10461439 | 4.163441 down  | Fads1         | fatty acid desaturase 1                                               |
| 10501971 | 4.1513643 down | Ank2          | ankyrin 2, brain                                                      |
| 10370544 | 4.137968 down  | 2610008E11Rik | RIKEN cDNA 2610008E11 gene                                            |
| 10589329 | 4.134366 up    | Pfkfb4        | 6-phosphofructo-2-kinase/fructose-2,6-biphosphatase 4                 |
| 10437516 | 4.126246 up    | Ppl           | periplakin                                                            |
| 10479852 | 4.1250978 up   | Camk1d        | calcium/calmodulin-dependent protein kinase ID                        |
| 10447602 | 4.120447 up    | Ezr           | ezrin                                                                 |
| 10600921 | 4.084951 down  | Stard8        | START domain containing 8                                             |
| 10410766 | 4.084083 down  | Nr2f1         | nuclear receptor subfamily 2, group F, member 1                       |
| 10358027 | 4.072275 up    | Elf3          | E74-like factor 3                                                     |
| 10417421 | 4.0716023 down | Hn1           | hematological and neurological expressed 1-like                       |
| 10362896 | 4.0685325 up   | Cd24a         | CD24a antigen                                                         |
| 10466779 | 4.054255 up    | Pip5k1b       | phosphatidylinositol-4-phosphate 5-kinase, type 1 beta                |
| 10602198 | 4.0399904 down | Pak3          | p21 (CDKN1A)-activated kinase 3                                       |
| 10409314 | 4.0382066 up   | Msx2          | homeobox, msh-like 2                                                  |
| 10458052 | 4.0325823 up   | Epb4.114a     | erythrocyte protein band 4.1-like 4a                                  |
| 10543017 | 4.030441 down  | Pdk4          | pyruvate dehydrogenase kinase, isoenzyme 4                            |
| 10478692 | 4.004745 down  | Slc2a10       | solute carrier family 2 (facilitated glucose transporter), member 10  |
| 10376832 | 3.9945476 down | Adora2b       | adenosine A2b receptor                                                |
| 10391762 | 3.9942625 down | Gjc1          | gap junction protein, gamma 1                                         |
| 10383502 | 3.9881494 down | Slc16a3       | solute carrier family 16 (monocarboxylic acid transporters), member 3 |
| 10398366 | 3.9845722 down |               |                                                                       |

## Sheet1

|          |           |      |               |                                                                           |
|----------|-----------|------|---------------|---------------------------------------------------------------------------|
| 10433445 | 3.982679  | down | Abat          | 4-aminobutyrate aminotransferase                                          |
| 10593413 | 3.9797707 | up   | 2310030G06Rik | RIKEN cDNA 2310030G06 gene                                                |
| 10591614 | 3.9684691 | down | Dock6         | dedicator of cytokinesis 6                                                |
| 10594679 | 3.9639714 | up   | Tln2          | talin 2                                                                   |
| 10495285 | 3.963006  | up   | Sort1         | sortilin 1                                                                |
| 10378319 | 3.958759  | down | P2rx5         | purinergic receptor P2X, ligand-gated ion channel, 5                      |
| 10546421 | 3.9548461 | down | Prickle2      | prickle-like 2 (Drosophila)                                               |
| 10453456 | 3.9477756 | up   | Kcnk12        | potassium channel, subfamily K, member 12                                 |
| 10365817 | 3.9449375 | up   | Ntn4          | netrin 4                                                                  |
| 10547322 | 3.9437902 | down | Cacna1c       | calcium channel, voltage-dependent, L type, alpha 1C subunit              |
| 10479195 | 3.9426901 | up   | RP23-232H13.5 | KRAB box and zinc finger, C2H2 type domain containing protein             |
| 10497463 | 3.939344  | down | Cpb1          | carboxypeptidase B1 (tissue)                                              |
| 10479198 | 3.9387255 | up   | RP23-442I10.2 | KRAB box and zinc finger, C2H2 type domain containing protein             |
| 10479192 | 3.9386942 | up   | RP23-442I10.2 | KRAB box and zinc finger, C2H2 type domain containing protein             |
| 10358476 | 3.9380772 | down | Prg4          | proteoglycan 4 (megakaryocyte stimulating factor, articular zone protein) |
| 10437160 | 3.9313276 | up   | Ets2          | E26 avian leukemia oncogene 2, 3' domain                                  |
| 10490273 | 3.9298205 | up   | RP23-232H13.5 | KRAB box and zinc finger, C2H2 type domain containing protein             |
| 10494643 | 3.9272108 | up   | Hmgcs2        | 3-hydroxy-3-methylglutaryl-Coenzyme A synthase 2                          |
| 10349569 | 3.925373  | up   |               |                                                                           |
| 10445574 | 3.9129844 | down | Cul7          | cullin 7                                                                  |
| 10439955 | 3.898642  | up   | Gm1752        | gene model 1752, (NCBI)                                                   |
| 10499378 | 3.898133  | up   | Sema4a        | semaphorin 4A                                                             |
| 10547657 | 3.8963993 | down | C3ar1         | complement component 3a receptor 1                                        |
| 10605815 | 3.8932157 | down | Asb12         | ankyrin repeat and SOCS box-containing protein 12                         |
| 10527920 | 3.891348  | down | Cyp51         | cytochrome P450, family 51                                                |
| 10361191 | 3.8825412 | up   | Syt14         | synaptotagmin XIV                                                         |
| 10496276 | 3.880582  | up   | Nhedc1        | Na <sup>+</sup> /H <sup>+</sup> exchanger domain containing 1             |
| 10361869 | 3.8777485 | up   | Nhs1          | NHS-like 1                                                                |
| 10604694 | 3.8672698 | down | Mtap7d3       | MAP7 domain containing 3                                                  |
| 10360398 | 3.8606098 | down | Ifi202b       | interferon activated gene 202B                                            |
| 10556546 | 3.830726  | up   | Calcb         | calcitonin-related polypeptide, beta                                      |
| 10586227 | 3.829836  | down | F730015K02Rik | RIKEN cDNA F730015K02 gene                                                |
| 10535231 | 3.827672  | down | Ttyh3         | tweety homolog 3 (Drosophila)                                             |
| 10453049 | 3.8276086 | down | Cdc42ep3      | CDC42 effector protein (Rho GTPase binding) 3                             |
| 10435641 | 3.8257544 | down | Fstl1         | follicle-stimulating hormone-like 1                                       |
| 10491414 | 3.8194993 | down | Usp13         | ubiquitin specific peptidase 13 (isopeptidase T-3)                        |
| 10466735 | 3.8186762 | up   | Gm967         | gene model 967, (NCBI)                                                    |
| 10556082 | 3.8144414 | up   | Ppfbp2        | protein tyrosine phosphatase, F interacting protein, binding protein 2    |

## Sheet1

|          |           |      |               |                                                                    |
|----------|-----------|------|---------------|--------------------------------------------------------------------|
| 10562323 | 3.8116727 | down | Wtip          | WT1-interacting protein                                            |
| 10362968 | 3.8111334 | down | Bves          | blood vessel epicardial substance                                  |
| 10497689 | 3.8013158 | down | Gnb4          | guanine nucleotide binding protein (G protein), beta 4             |
| 10553521 | 3.798642  | down | Gas2          | growth arrest specific 2                                           |
| 10353775 | 3.7965846 | down | B230209C24Rik | RIKEN cDNA B230209C24 gene                                         |
| 10495685 | 3.775644  | down | Arhgap29      | Rho GTPase activating protein 29                                   |
| 10568436 | 3.7732725 | down | Fgfr2         | fibroblast growth factor receptor 2                                |
| 10346374 | 3.7711928 | up   | Aox1          | aldehyde oxidase 1                                                 |
| 10502230 | 3.770612  | down |               |                                                                    |
| 10444459 | 3.7446415 | up   | Tnxb          | tenascin XB                                                        |
| 10375358 | 3.741744  | down | Ebf1          | early B-cell factor 1                                              |
| 10550332 | 3.7397718 | down | Slc1a5        | solute carrier family 1 (neutral amino acid transporter), member 5 |
| 10434880 | 3.7347038 | down | Hrasls        | HRAS-like suppressor                                               |
| 10478698 | 3.7342088 | down | Eya2          | eyes absent 2 homolog (Drosophila)                                 |
| 10579763 | 3.7313786 | up   |               |                                                                    |
| 10416777 | 3.7292013 | up   | Klf5          | Kruppel-like factor 5                                              |
| 10354506 | 3.7281008 | up   | 2210010L05Rik | RIKEN cDNA 2210010L05 gene                                         |
| 10437885 | 3.7270486 | down | Myh11         | myosin, heavy polypeptide 11, smooth muscle                        |
| 10552037 | 3.7175999 | up   | Sbsn          | suprabasin                                                         |
| 10453604 | 3.715347  | down | Bambi         | BMP and activin membrane-bound inhibitor, homolog (Xenopus laevis) |
| 10540935 | 3.7083027 | down | Cand2         | cullin-associated and neddylation-dissociated 2 (putative)         |
| 10368289 | 3.7024682 | down | Enpp1         | ectonucleotide pyrophosphatase/phosphodiesterase 1                 |
| 10397145 | 3.7010722 | down | Acot2         | acyl-CoA thioesterase 2                                            |
| 10379727 | 3.7007897 | down |               |                                                                    |
| 10361882 | 3.6973393 | up   | Nhsl1         | NHS-like 1                                                         |
| 10474045 | 3.6937141 | up   | Chst1         | carbohydrate (keratan sulfate Gal-6) sulfotransferase 1            |
| 10587266 | 3.6818922 | up   | Gclc          | glutamate-cysteine ligase, catalytic subunit                       |
| 10356084 | 3.676804  | down | Irs1          | insulin receptor substrate 1                                       |
| 10507908 | 3.6656554 | down | Fhl3          | four and a half LIM domains 3                                      |
| 10394471 | 3.6606767 | up   | Sdc1          | syndecan 1                                                         |
| 10606609 | 3.658318  | down | Tspan6        | tetraspanin 6                                                      |
| 10530156 | 3.6551394 | up   | Tmem156       | transmembrane protein 156                                          |
| 10520362 | 3.654475  | down | Insig1        | insulin induced gene 1                                             |
| 10571344 | 3.650209  | up   | D8Ertd82e     | DNA segment, Chr 8, ERATO Doi 82, expressed                        |
| 10605431 | 3.6469398 | down | Rab39b        | RAB39B, member RAS oncogene family                                 |
| 10521984 | 3.6450007 | up   | G6pd2         | glucose-6-phosphate dehydrogenase 2                                |
| 10600093 | 3.642196  | up   | Zfp185        | zinc finger protein 185                                            |
| 10465916 | 3.6376195 | down | Gm98          | gene model 98, (NCBI)                                              |

## Sheet1

|          |           |      |                    |                                                                    |
|----------|-----------|------|--------------------|--------------------------------------------------------------------|
| 10408935 | 3.6363633 | down | ENSMUSG00000074917 |                                                                    |
| 10589654 | 3.6303446 | up   | Als2cl             | ALS2 C-terminal like                                               |
| 10485597 | 3.616573  | up   | Depdc7             | DEP domain containing 7                                            |
| 10501208 | 3.6153898 | up   | Gstm6              | glutathione S-transferase, mu 6                                    |
| 10472400 | 3.612263  | down | Scn2a1             | sodium channel, voltage-gated, type II, alpha 1                    |
| 10398368 | 3.5985005 | down |                    |                                                                    |
| 10398376 | 3.5954    | down |                    |                                                                    |
| 10417258 | 3.5945399 | down | ENSMUSG000000      | predicted gene, ENSMUSG00000063277                                 |
| 10398372 | 3.593612  | down |                    |                                                                    |
| 10346607 | 3.5925968 | down | Fzd7               | frizzled homolog 7 (Drosophila)                                    |
| 10554808 | 3.5877197 | up   | Fzd4               | frizzled homolog 4 (Drosophila)                                    |
| 10544875 | 3.5864131 | down | Scrn1              | secernin 1                                                         |
| 10483000 | 3.5845857 | up   | Itgb6              | integrin beta 6                                                    |
| 10395163 | 3.5751438 | down | Lamb1-1            | laminin B1 subunit 1                                               |
| 10604564 | 3.5600905 | down | Gpc4               | glypican 4                                                         |
| 10424349 | 3.557684  | down | Sqle               | squalene epoxidase                                                 |
| 10398240 | 3.555401  | down | Eml1               | echinoderm microtubule associated protein like 1                   |
| 10595718 | 3.5551472 | down | Chst2              | carbohydrate sulfotransferase 2                                    |
| 10562905 | 3.5482295 | down | Atf5               | activating transcription factor 5                                  |
| 10499935 | 3.5480125 | up   | Lce1i              | late cornified envelope 1l                                         |
| 10518735 | 3.5471473 | up   | Spsb1              | splA/ryanodine receptor domain and SOCS box containing 1           |
| 10356475 | 3.546268  | up   | Arl4c              | ADP-ribosylation factor-like 4C                                    |
| 10472398 | 3.5407295 | down | Scn2a1             | sodium channel, voltage-gated, type II, alpha 1                    |
| 10389894 | 3.54019   | up   | Abcc3              | ATP-binding cassette, sub-family C (CFTR/MRP), member 3            |
| 10544788 | 3.536816  | down | Hoxa9              | homeo box A9                                                       |
| 10470050 | 3.534029  | up   | Abca2              | ATP-binding cassette, sub-family A (ABC1), member 2                |
| 10417235 | 3.5289118 | down | ENSMUSG000000      | predicted gene, ENSMUSG00000068790                                 |
| 10466304 | 3.527158  | up   | Dtx4               | deltex 4 homolog (Drosophila)                                      |
| 10417315 | 3.5247457 | down | LOC100041306       | alpha23-takusan                                                    |
| 10362387 | 3.5244849 | up   |                    |                                                                    |
| 10482687 | 3.5192792 | down | Arl5a              | ADP-ribosylation factor-like 5A                                    |
| 10420268 | 3.5021615 | up   | Gzme               | granzyme E                                                         |
| 10582664 | 3.4913762 | down | 2310022B05Rik      | RIKEN cDNA 2310022B05 gene                                         |
| 10605338 | 3.4831214 | up   | G6pdx              | glucose-6-phosphate dehydrogenase X-linked                         |
| 10586254 | 3.4795198 | down | Dennd4a            | DENN/MADD domain containing 4A                                     |
| 10439527 | 3.4750617 | up   | LOC100043314       | similar to poliovirus receptor-related 4                           |
| 10376868 | 3.4692616 | down | Trpv2              | transient receptor potential cation channel, subfamily V, member 2 |
| 10417302 | 3.469093  | down | ENSMUSG000000      | predicted gene, ENSMUSG00000063277                                 |

## Sheet1

|          |                |                    |                                                                           |
|----------|----------------|--------------------|---------------------------------------------------------------------------|
| 10406111 | 3.465411 up    | Slc12a7            | solute carrier family 12, member 7                                        |
| 10425287 | 3.4503238 down | Kdelr3             | KDEL (Lys-Asp-Glu-Leu) endoplasmic reticulum protein retention receptor 3 |
| 10579872 | 3.430429 up    | Tpd52              | tumor protein D52                                                         |
| 10377938 | 3.4269748 down | Eno3               | enolase 3, beta muscle                                                    |
| 10535559 | 3.4160821 up   | Baiap2l1           | BAI1-associated protein 2-like 1                                          |
| 10594855 | 3.411287 up    | Cgnl1              | cingulin-like 1                                                           |
| 10590909 | 3.4110546 up   | Endod1             | endonuclease domain containing 1                                          |
| 10515007 | 3.3882449 down | Gpx7               | glutathione peroxidase 7                                                  |
| 10425945 | 3.3862722 down | Fbln1              | fibulin 1                                                                 |
| 10463070 | 3.3820753 down | Entpd1             | ectonucleoside triphosphate diphosphohydrolase 1                          |
| 10584674 | 3.3773649 down | Mcam               | melanoma cell adhesion molecule                                           |
| 10530633 | 3.3540516 down | Sgcb               | sarcoglycan, beta (dystrophin-associated glycoprotein)                    |
| 10417264 | 3.350411 down  | ENSMUSG00000       | predicted gene, ENSMUSG00000063277 LOC100036568                           |
| 10500204 | 3.3470173 up   | Ecm1               | extracellular matrix protein 1                                            |
| 10380381 | 3.3429024 up   | Tob1               | transducer of ErbB-2.1                                                    |
| 10501104 | 3.341683 down  | Slc6a17            | solute carrier family 6 (neurotransmitter transporter), member 17         |
| 10431637 | 3.3390949 up   | Cpne8              | copine VIII                                                               |
| 10412513 | 3.3363657 down | 1700001E04Rik      | RIKEN cDNA 1700001E04 gene                                                |
| 10518346 | 3.3352873 down | RP24-320O9.1       | novel KRAB box containing protein                                         |
| 10563441 | 3.3248818 down | Emp3               | epithelial membrane protein 3                                             |
| 10365420 | 3.3231921 down | AI597468           |                                                                           |
| 10471457 | 3.3230119 down | St6galnac4         | ST6-N-acetylgalactosaminide alpha-2,6-sialyltransferase 4                 |
| 10600453 | 3.3093092 up   | lkbkg              | inhibitor of kappaB kinase gamma                                          |
| 10544406 | 3.307306 down  | 6330503C03Rik      | RIKEN cDNA 6330503C03 gene                                                |
| 10546631 | 3.3054984 up   | Frmd4b             | FERM domain containing 4B                                                 |
| 10363350 | 3.300422 down  | P4ha1              | procollagen-proline, 2-oxoglutarate 4-dioxygenase, alpha 1 polypeptide    |
| 10538658 | 3.298022 up    | Herc3              | hect domain and RLD 3                                                     |
| 10380622 | 3.294931 down  | Hoxb9              | homeo box B9                                                              |
| 10472953 | 3.2942624 down | Hoxd11             | homeo box D11                                                             |
| 10502081 | 3.2834854 up   | Enpep              | glutamyl aminopeptidase                                                   |
| 10459772 | 3.2832327 down | Lipg               | lipase, endothelial                                                       |
| 10476935 | 3.2822204 down | OTTMUSG00000015750 |                                                                           |
| 10581538 | 3.2793717 down | Nqo1               | NAD(P)H dehydrogenase, quinone 1                                          |
| 10381445 | 3.2715044 down | Tmem106a           | transmembrane protein 106A                                                |
| 10576386 | 3.2628763 up   | Rhou               | ras homolog gene family, member U                                         |
| 10414623 | 3.2534719 down | E130112L23Rik      | RIKEN cDNA E130112L23 gene                                                |
| 10512024 | 3.2508857 up   | Mobk12b            | MOB1, Mps One Binder kinase activator-like 2B (yeast)                     |
| 10349345 | 3.238771 down  | En1                | engrailed 1                                                               |

## Sheet1

|          |                |               |                                                                |
|----------|----------------|---------------|----------------------------------------------------------------|
| 10540679 | 3.2386544 up   | Il17re        | interleukin 17 receptor E                                      |
| 10513166 | 3.2275763 up   | Ptpn3         | protein tyrosine phosphatase, non-receptor type 3              |
| 10586242 | 3.2233481 down | Dennd4a       | DENN/MADD domain containing 4A                                 |
| 10362138 | 3.2220263 up   | Vnn1          | vanin 1                                                        |
| 10476795 | 3.218565 up    | 4930529M08Rik | RIKEN cDNA 4930529M08 gene   similar to 4930529M08Rik protein  |
| 10422280 | 3.2026772 up   | Abcc4         | ATP-binding cassette, sub-family C (CFTR/MRP), member 4        |
| 10539669 | 3.2018993 up   | Add2          | adducin 2 (beta)                                               |
| 10417373 | 3.1936817 down | Hn101         | hematological and neurological expressed 1-like                |
| 10574220 | 3.188444 down  | Cx3cl1        | chemokine (C-X3-C motif) ligand 1                              |
| 10417326 | 3.1722183 down | Hn1l          | hematological and neurological expressed 1-like                |
| 10582719 | 3.1661022 down | Sipa1l2       | signal-induced proliferation-associated 1 like 2               |
| 10365098 | 3.1629884 down | Tbxa2r        | thromboxane A2 receptor                                        |
| 10472396 | 3.145973 down  | Scn2a1        | sodium channel, voltage-gated, type II, alpha 1                |
| 10599956 | 3.139809 up    | LOC100040304  | similar to syndecan-1                                          |
| 10390211 | 3.1317878 down | Igf2bp1       | insulin-like growth factor 2 mRNA binding protein 1            |
| 10576973 | 3.1298723 down | Col4a1        | collagen, type IV, alpha 1                                     |
| 10412909 | 3.1271074 down | Fdft1         | farnesyl diphosphate farnesyl transferase 1                    |
| 10566943 | 3.1257105 down | Mrv1          | MRV integration site 1                                         |
| 10436519 | 3.1188147 down | Robo1         | roundabout homolog 1 (Drosophila)                              |
| 10417446 | 3.1173081 down | D830030K20Rik | RIKEN cDNA D830030K20 gene                                     |
| 10393887 | 3.114303 down  | Pycr1         | pyrroline-5-carboxylate reductase 1                            |
| 10558921 | 3.1115148 up   | Pnpla2        | patatin-like phospholipase domain containing 2                 |
| 10465895 | 3.1113298 down | Fads2         | fatty acid desaturase 2                                        |
| 10554156 | 3.1111796 down | BC034069      |                                                                |
| 10513145 | 3.1023948 up   | Ptpn3         | protein tyrosine phosphatase, non-receptor type 3              |
| 10590489 | 3.0882359 down | Zfp105        | zinc finger protein 105                                        |
| 10417452 | 3.0845604 down | 4930555G01Rik | RIKEN cDNA 4930555G01 gene   hypothetical protein LOC100041019 |
| 10404152 | 3.0736363 down | 6330500D04Rik | RIKEN cDNA 6330500D04 gene                                     |
| 10570278 | 3.0704918 up   |               |                                                                |
| 10570483 | 3.0701132 down | Arhgef10      | Rho guanine nucleotide exchange factor (GEF) 10                |
| 10482528 | 3.066808 down  | Neb           | nebulin                                                        |
| 10479182 | 3.0434911 up   | RP23-442110.2 | KRAB box and zinc finger, C2H2 type domain containing          |
| 10490262 | 3.0434911 up   | RP23-442110.2 | KRAB box and zinc finger, C2H2 type domain containing          |
| 10490268 | 3.0434833 up   | RP23-442110.2 | KRAB box and zinc finger, C2H2 type domain containing          |
| 10386916 | 3.0433583 down | BC046404      |                                                                |
| 10490265 | 3.0429702 up   | RP23-442110.2 | KRAB box and zinc finger, C2H2 type domain containing          |
| 10479189 | 3.0424433 up   | RP23-442110.2 | KRAB box and zinc finger, C2H2 type domain containing          |
| 10490259 | 3.0424433 up   | RP23-232H13.5 | KRAB box and zinc finger, C2H2 type domain containing          |

## Sheet1

|          |                |               |                                                       |
|----------|----------------|---------------|-------------------------------------------------------|
| 10490291 | 3.0424352 up   | RP23-442I10.2 | KRAB box and zinc finger, C2H2 type domain containing |
| 10580795 | 3.0310512 down | Ccdc102a      | coiled-coil domain containing 102A                    |
| 10350733 | 3.0245693 down | Rgs16         | regulator of G-protein signaling 16                   |
| 10483698 | 3.0190682 down | Wipf1         | WAS/WASL interacting protein family, member 1         |
| 10601412 | 3.017821 down  | Lpar4         | lysophosphatidic acid receptor 4                      |
| 10496605 | 3.0165117 down | Ccbl2         | cysteine conjugate-beta lyase 2                       |
| 10361133 | 3.0154362 down |               |                                                       |
| 10458555 | 3.0144129 down | Spry4         | sprouty homolog 4 (Drosophila)                        |
| 10518300 | 3.0133648 up   | Tnfrsf1b      | tumor necrosis factor receptor superfamily, member 1b |
| 10592719 | 3.0113575 down | Oaf           | OAF homolog (Drosophila)                              |
